# Supplementary material for: A Model for Sigma Factor Competition in Bacterial Cells
Source: PubMed Central journal article supplement (PMC4191881; doi:10.1371/journal.pcbi.1003845), 2014-10-09
Supplement: pcbi.1003845.s003.pdf [file pcbi.1003845.s003.pdf]

| $\sigma^i$      | $K_{E\sigma^i}/K_{E\sigma^{70}}$ [31] | $K_{E\sigma^i}/K_{E\sigma^{70}}$ our fit |
|-----------------|---------------------------------------|------------------------------------------|
| $\sigma^N$      | 1.55                                  | 1.59                                     |
| $\sigma^F$      | 2.85                                  | 4.02                                     |
| $\sigma^H$      | 4.75                                  | 7.29                                     |
| $\sigma^{FecI}$ | 6.65                                  | 8.28                                     |
| $\sigma^E$      | 9.35                                  | 8.05                                     |
| $\sigma^S$      | 16.4                                  | 29.59                                    |

**Table S1.** Dissociation constants of different holoenzyme species relative to  $K_{E\sigma^{70}}$ , from reference [31] (second column) and according to our fit with Equation 1 (third column).
